# Supplementary material
Source: publisher figshare collection journal article supplement (https://tandf.figshare.com/articles/dataset/_/7539392)

# Supporting Information

Terpenes and lignans from the roots of *Solanum melongena* L.

Bing-You Yang, Xin Yin, Yan Liu, Yan Sun, Wei Guan, Yuan-yuan Zhou and Hai-Xue Kuang\*

Key Laboratory of Chinese Materia Medica, Ministry of Education of Heilongjiang University of Chinese Medicine, Harbin 150040, P.R. China

## Correspondence

Professor Hai-Xue Kuang

College of Pharmacy, Heilongjiang University of Chinese Medicine

24 Heping Road, Xiangfang District, Harbin 150040, P.R. China

Tel: +86 0451-87267188, E-mail: hxkuang@yahoo.com

## ABSTRACT

Phytochemical investigation of the roots of *Solanum melongena* L. resulted in the isolation of ten terpenes and sixteen lignans, including a new triterpene saponin, officinoterpenoside E (**1**) and twenty-five known compounds (**2-26**). All compounds were firstly isolated from *S. melongena* except **2**, **13**, **21**, **22**. The structures of these compounds were determined by 1D and 2D NMR spectra referring to the literatures, together with high-resolution mass spectrometric analysis. All compounds were evaluated for the cytotoxicity against three cancer cell lines (HepG2, Hela, and MCF-7) *in vitro*. The results showed that compounds **1**, **6**, **20**, **25** and **26** exhibited moderate cytotoxicity against HepG2, Hela and MCF-7 cells with IC<sub>50</sub> values in the range of 16.8±1.7 to 29.1±1.9 μM. Therefore, these terpenoids and lignans may have potential biological activity, and also seemed to be of great chemotaxonomic value for *S. melongena*.

**Keywords:** Solanaceae, *Solanum*, Natural product, Terpene, Lignan, Cytotoxicity

**Table S1**  $^{13}\text{C}$ -NMR Data of **2-10** (100 MHz in  $^{13}\text{C}$  NMR)

| NO. | 2 <sup>b</sup> | 3 <sup>b</sup> | 4 <sup>a</sup> | 5 <sup>a</sup> | 6 <sup>a</sup> | 7 <sup>a</sup> | 8 <sup>a</sup> | 9 <sup>b</sup> | 10 <sup>b</sup> |
|-----|----------------|----------------|----------------|----------------|----------------|----------------|----------------|----------------|-----------------|
| 1   | 47.8           | 50.5           | 42.4           | 42.7           | 37.0           | 37.6           | 42.5           | 14.2           | 13.9            |
| 2   | 69.0           | 69.5           | 50.7           | 50.5           | 49.9           | 49.3           | 43.7           | 132.2          | 136.4           |
| 3   | 78.2           | 78.8           | 201.2          | 200.4          | 62.9           | 33.8           | 34.2           | 128.8          | 124.9           |
| 4   | 43.8           | 45.0           | 127.1          | 128.0          | 48.0           | 26.2           | 35.4           | 23.0           | 22.6            |
| 5   | 48.0           | 49.2           | 167.4          | 164.7          | 77.8           | 47.8           | 51.6           | 42.0           | 42.8            |
| 6   | 18.6           | 68.0           | 80.0           | 80.0           | 119.0          | 42.4           | 170.5          | 72.2           | 80.0            |
| 7   | 32.9           | 41.5           | 136.9          | 148.4          | 200.7          | 41.8           | 125.8          | 146.9          | 144.5           |
| 8   | 39.9           | 39.8           | 130.0          | 131.7          | 101.4          | 70.7           | 201.9          | 111.3          | 114.8           |
| 9   | 48.3           | 49.3           | 68.6           | 200.6          | 213.0          | 41.8           | 43.8           | 75.4           | 68.1            |
| 10  | 38.5           | 38.7           | 23.8           | 27.6           | 26.6           | 49.7           | 40.6           | 28.4           | 23.5            |
| 11  | 23.8           | 24.2           | 19.5           | 19.1           | 32.5           | 149.3          | 152.5          |                |                 |
| 12  | 122.6          | 123.4          | 23.4           | 23.5           | 26.7           | 108.7          | 108.4          |                |                 |
| 13  | 145.0          | 144.7          | 24.5           | 24.7           | 30.1           | 21.6           | 65.8           |                |                 |
| 14  | 42.3           | 43.2           |                |                |                | 17.2           | 21.2           |                |                 |
| 15  | 28.4           | 28.7           |                |                |                | 64.6           | 16.1           |                |                 |
| 16  | 24.1           | 24.5           |                |                |                |                |                |                |                 |
| 17  | 46.8           | 47.1           |                |                |                |                |                |                |                 |
| 18  | 42.1           | 42.5           |                |                |                |                |                |                |                 |
| 19  | 46.5           | 46.9           |                |                |                |                |                |                |                 |
| 20  | 31.0           | 31.4           |                |                |                |                |                |                |                 |
| 21  | 34.3           | 34.7           |                |                |                |                |                |                |                 |
| 22  | 33.3           | 33.7           |                |                |                |                |                |                |                 |
| 23  | 66.5           | 66.6           |                |                |                |                |                |                |                 |
| 24  | 14.5           | 16.4           |                |                |                |                |                |                |                 |
| 25  | 17.4           | 19.4           |                |                |                |                |                |                |                 |
| 26  | 17.6           | 19.1           |                |                |                |                |                |                |                 |
| 27  | 26.2           | 26.7           |                |                |                |                |                |                |                 |
| 28  | 180.6          | 180.6          |                |                |                |                |                |                |                 |
| 29  | 33.3           | 33.7           |                |                |                |                |                |                |                 |
| 30  | 23.9           | 24.2           |                |                |                |                |                |                |                 |
| 1'  |                |                |                |                | 98.7           |                |                | 103.5          | 99.8            |
| 2'  |                |                |                |                | 75.3           |                |                | 75.2           | 75.1            |
| 3'  |                |                |                |                | 78.7           |                |                | 78.8           | 78.6            |
| 4'  |                |                |                |                | 71.7           |                |                | 71.8           | 71.7            |
| 5'  |                |                |                |                | 78.6           |                |                | 78.5           | 78.1            |
| 6'  |                |                |                |                | 63.8           |                |                | 62.8           | 62.9            |

<sup>a</sup> Measured in CD<sub>3</sub>OD<sup>b</sup> Measured in C<sub>5</sub>D<sub>5</sub>N

**Table S2** <sup>13</sup>C-NMR Data of **11-26** (100 MHz in <sup>13</sup>C NMR)

| NO.              | 11 <sup>a</sup> | 12 <sup>a</sup> | 13 <sup>b</sup> | 14 <sup>a</sup> | 15 <sup>a</sup> | 16 <sup>a</sup> | 17 <sup>a</sup> | 18 <sup>a</sup> | 19 <sup>a</sup> | 20 <sup>a</sup> | 21 <sup>a</sup> | 22 <sup>a</sup> | 23 <sup>a</sup> | 24 <sup>a</sup> | 25 <sup>a</sup> | 26 <sup>a</sup> |
|------------------|-----------------|-----------------|-----------------|-----------------|-----------------|-----------------|-----------------|-----------------|-----------------|-----------------|-----------------|-----------------|-----------------|-----------------|-----------------|-----------------|
| 1                | 139.6           | 135.6           | 132.1           | 130.4           | 130.4           | 129.1           | 132.7           | 133.2           | 132.3           | 133.7           | 133.6           | 133.7           | 139.3           | 138.6           | 134.2           | 133.8           |
| 2                | 104.5           | 104.9           | 102.7           | 125.2           | 112.6           | 107.8           | 115.7           | 115.6           | 114.8           | 111.7           | 111.7           | 110.6           | 106.8           | 113.8           | 111.8           | 111.4           |
| 3                | 154.4           | 154.4           | 147.1           | 112.5           | 148.9           | 148.9           | 148.5           | 148.7           | 148.6           | 147.2           | 147.2           | 149.2           | 149.0           | 149.0           | 148.7           | 148.6           |
| 4                | 135.6           | 139.5           | 134.2           | 153.1           | 153.2           | 153.2           | 146.8           | 146.9           | 146.1           | 151.7           | 148.7           | 147.9           | 134.5           | 146.0           | 146.9           | 146.8           |
| 5                | 154.4           | 154.4           | 147.1           | 148.9           | 115.7           | 148.9           | 114.3           | 114.7           | 115.7           | 115.8           | 115.8           | 116.3           | 149.0           | 116.0           | 118.3           | 115.6           |
| 6                | 104.5           | 104.9           | 102.7           | 115.7           | 125.2           | 107.8           | 122.6           | 123.2           | 123.4           | 120.6           | 120.7           | 119.9           | 106.8           | 123.2           | 120.8           | 120.7           |
| 7                | 87.6            | 87.1            | 86.1            | 199.7           | 199.6           | 199.4           | 87.4            | 84.9            | 82.8            | 73.9            | 74.3            | 90.6            | 42.3            | 48.1            | 75.1            | 74.1            |
| 8                | 55.5            | 55.7            | 54.3            | 56.3            | 56.3            | 56.6            | 57.0            | 56.1            | 56.5            | 85.7            | 88.7            | 54.3            | 49.9            | 48.0            | 86.2            | 87.2            |
| 9                | 72.9            | 73.0            | 71.8            | 65.5            | 65.5            | 65.4            | 65.0            | 64.4            | 64.5            | 62.1            | 62.1            | 64.5            | 64.2            | 62.2            | 62.1            | 61.7            |
| 1'               | 133.1           | 135.6           | 132.1           | 129.9           | 129.3           | 129.0           | 132.6           | 132.3           | 134.0           | 155.8           | 133.5           | 132.8           | 130.2           | 129.0           | 139.3           | 136.6           |
| 2'               | 104.8           | 104.9           | 102.7           | 112.7           | 106.7           | 106.7           | 115.5           | 115.5           | 111.8           | 148.9           | 107.9           | 122.3           | 107.8           | 112.4           | 112.4           | 104.0           |
| 3'               | 149.4           | 154.4           | 147.1           | 149.3           | 149.6           | 149.6           | 148.3           | 148.3           | 148.2           | 111.6           | 154.8           | 131.2           | 148.7           | 147.2           | 151.3           | 154.7           |
| 4'               | 136.2           | 139.5           | 134.2           | 147.0           | 136.0           | 136.1           | 146.0           | 146.2           | 146.7           | 131.8           | 143.3           | 155.6           | 138.9           | 145.3           | 148.0           | 138.8           |
| 5'               | 149.4           | 154.4           | 147.1           | 116.6           | 149.6           | 149.6           | 112.3           | 111.8           | 115.7           | 127.2           | 154.8           | 146.3           | 147.7           | 117.3           | 115.6           | 154.7           |
| 6'               | 104.8           | 104.9           | 102.7           | 122.2           | 106.7           | 106.7           | 121.6           | 121.3           | 121.0           | 115.9           | 107.9           | 113.9           | 126.2           | 134.2           | 120.2           | 103.9           |
| 7'               | 87.2            | 87.1            | 86.1            |                 |                 |                 |                 |                 |                 | 192.9           | 193.0           | 192.7           | 33.6            | 33.6            | 74.0            | 89.7            |
| 8'               | 55.7            | 55.7            | 54.3            |                 |                 |                 |                 |                 |                 |                 |                 |                 | 40.9            | 40.0            | 56.6            | 55.0            |
| 9'               | 72.9            | 73.0            | 71.8            |                 |                 |                 |                 |                 |                 |                 |                 |                 | 66.8            | 65.9            | 64.3            | 64.6            |
| 1''              |                 |                 |                 |                 |                 |                 |                 |                 | 65.2            |                 |                 |                 |                 |                 | 132.0           | 129.9           |
| 2''              |                 |                 |                 |                 |                 |                 |                 |                 | 15.6            |                 |                 |                 |                 |                 | 115.6           | 114.3           |
| 3''              |                 |                 |                 |                 |                 |                 |                 |                 |                 |                 |                 |                 |                 |                 | 148.3           | 146.1           |
| 4''              |                 |                 |                 |                 |                 |                 |                 |                 |                 |                 |                 |                 |                 |                 | 146.2           | 152.8           |
| 5''              |                 |                 |                 |                 |                 |                 |                 |                 |                 |                 |                 |                 |                 |                 | 114.5           | 130.9           |
| 6''              |                 |                 |                 |                 |                 |                 |                 |                 |                 |                 |                 |                 |                 |                 | 123.2           | 119.9           |
| 7''              |                 |                 |                 |                 |                 |                 |                 |                 |                 |                 |                 |                 |                 |                 |                 | 156.0           |
| 8''              |                 |                 |                 |                 |                 |                 |                 |                 |                 |                 |                 |                 |                 |                 |                 | 127.3           |
| 9''              |                 |                 |                 |                 |                 |                 |                 |                 |                 |                 |                 |                 |                 |                 |                 | 196.1           |
| 1'''             | 105.3           | 105.3           |                 |                 |                 |                 |                 |                 |                 |                 |                 |                 |                 |                 |                 |                 |
| 2'''             | 75.7            | 75.7            |                 |                 |                 |                 |                 |                 |                 |                 |                 |                 |                 |                 |                 |                 |
| 3'''             | 78.4            | 78.3            |                 |                 |                 |                 |                 |                 |                 |                 |                 |                 |                 |                 |                 |                 |
| 4'''             | 71.3            | 71.3            |                 |                 |                 |                 |                 |                 |                 |                 |                 |                 |                 |                 |                 |                 |
| 5'''             | 77.8            | 77.8            |                 |                 |                 |                 |                 |                 |                 |                 |                 |                 |                 |                 |                 |                 |
| 6'''             | 62.6            | 62.6            |                 |                 |                 |                 |                 |                 |                 |                 |                 |                 |                 |                 |                 |                 |
| 1''''            |                 | 105.3           |                 |                 |                 |                 |                 |                 |                 |                 |                 |                 |                 |                 |                 |                 |
| 2''''            |                 | 75.7            |                 |                 |                 |                 |                 |                 |                 |                 |                 |                 |                 |                 |                 |                 |
| 3''''            |                 | 78.3            |                 |                 |                 |                 |                 |                 |                 |                 |                 |                 |                 |                 |                 |                 |
| 4''''            |                 | 71.3            |                 |                 |                 |                 |                 |                 |                 |                 |                 |                 |                 |                 |                 |                 |
| 5''''            |                 | 77.8            |                 |                 |                 |                 |                 |                 |                 |                 |                 |                 |                 |                 |                 |                 |
| 6''''            |                 | 62.6            |                 |                 |                 |                 |                 |                 |                 |                 |                 |                 |                 |                 |                 |                 |
| OCH <sub>3</sub> | 57.1            | 57.1            | 56.4            | 56.2            | 56.8            | 56.8            | 56.8            | 57.1            | 56.3            | 56.3            | 56.4            | 56.3            | 56.8            | 56.3            | 56.4            | 56.8            |
| OCH <sub>3</sub> | 57.1            | 57.1            | 56.4            | 56.4            | 56.8            | 56.8            | 56.3            | 56.5            | 56.1            | 56.5            | 56.8            | 56.7            | 56.8            | 56.4            | 56.4            | 56.8            |
| OCH <sub>3</sub> | 56.8            | 57.1            | 56.4            |                 | 56.8            | 56.8            | 56.0            | 56.4            |                 |                 |                 |                 | 56.6            |                 | 56.4            | 56.6            |
| OCH <sub>3</sub> | 56.8            | 57.1            | 56.4            |                 |                 | 56.8            |                 |                 |                 |                 |                 |                 | 60.1            |                 |                 | 56.3            |

<sup>a</sup> Measured in CD<sub>3</sub>OD<sup>b</sup> Measured in CDCl<sub>3</sub>

**Table S3** Cytotoxic activities of compounds (**1-26**) from the roots of *Solanum melongena* L.

| Compound  | IC <sub>50</sub> (μM) |            |            | Compound                 | IC <sub>50</sub> (μM) |            |            |
|-----------|-----------------------|------------|------------|--------------------------|-----------------------|------------|------------|
|           | HepG2                 | Hela       | MCF-7      |                          | HepG2                 | Hela       | MCF-7      |
| <b>1</b>  | 16.8 ± 1.7            | 25.9 ± 2.3 | 22.8 ± 2.1 | <b>15</b>                | 44.4 ± 3.7            | 66.7 ± 4.4 | 61.7 ± 2.0 |
| <b>2</b>  | 55.1 ± 3.3            | 37.8 ± 3.6 | 68.8 ± 4.1 | <b>16</b>                | 53.5 ± 2.9            | 55.6 ± 3.4 | 48.8 ± 4.1 |
| <b>3</b>  | 70.3 ± 4.4            | >80        | >80        | <b>17</b>                | >80                   | 69.9 ± 3.7 | 59.7 ± 2.9 |
| <b>4</b>  | >80                   | >80        | 62.8 ± 4.5 | <b>18</b>                | >80                   | >80        | 71.2 ± 3.3 |
| <b>5</b>  | 58.7 ± 1.9            | 72.8 ± 2.3 | >80        | <b>19</b>                | >80                   | >80        | >80        |
| <b>6</b>  | 25.5 ± 1.2            | 28.8 ± 1.9 | 24.7 ± 2.5 | <b>20</b>                | 19.8 ± 1.7            | 24.6 ± 2.4 | 27.8 ± 2.1 |
| <b>7</b>  | >80                   | >80        | 68.6 ± 2.7 | <b>21</b>                | 38.9 ± 2.8            | 29.7 ± 1.9 | 58.8 ± 2.9 |
| <b>8</b>  | >80                   | >80        | >80        | <b>22</b>                | >80                   | >80        | >80        |
| <b>9</b>  | 42.7 ± 2.3            | 55.6 ± 3.9 | 47.8 ± 2.1 | <b>23</b>                | >80                   | >80        | >80        |
| <b>10</b> | 51.6 ± 3.0            | 55.7 ± 2.4 | 61.4 ± 2.2 | <b>24</b>                | >80                   | >80        | >80        |
| <b>11</b> | >80                   | >80        | >80        | <b>25</b>                | 29.1 ± 1.9            | 22.4 ± 1.3 | 28.9 ± 1.4 |
| <b>12</b> | >80                   | >80        | >80        | <b>26</b>                | 24.4 ± 2.2            | 17.8 ± 1.3 | 26.7 ± 1.6 |
| <b>13</b> | >80                   | >80        | >80        | doxorubicin <sup>a</sup> | 7.9 ± 1.5             | 8.8 ± 1.1  | 6.1 ± 1.9  |
| <b>14</b> | 38.9 ± 4.1            | 46.7 ± 3.2 | 40.6 ± 1.9 |                          |                       |            |            |

<sup>a</sup> Positive control.

**Fig.S1** Key HMBC,  $^1\text{H}$ - $^1\text{H}$  COSY and NOESY correlations of compound **1**

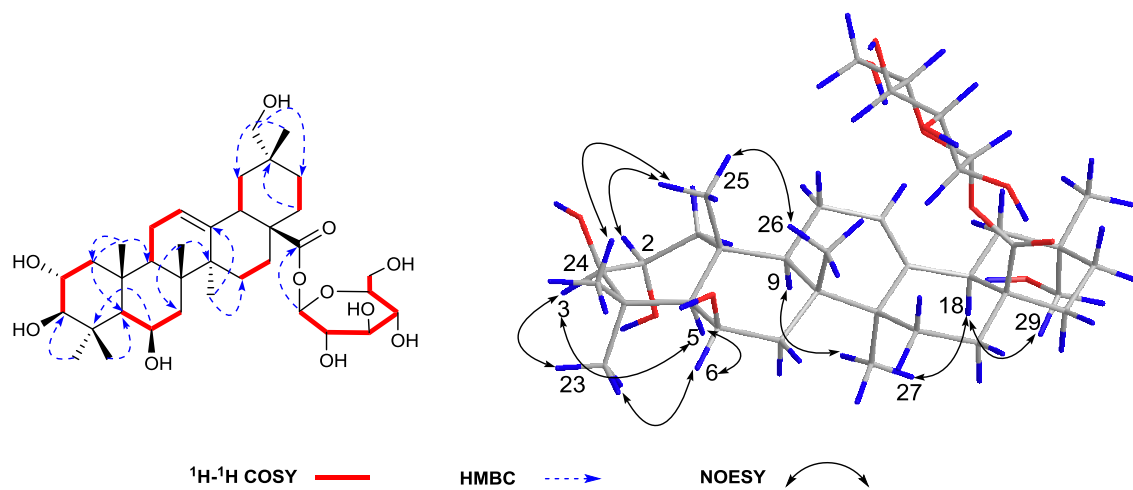

Fig. 2S  $^1\text{H}$  NMR spectrum of compound 1

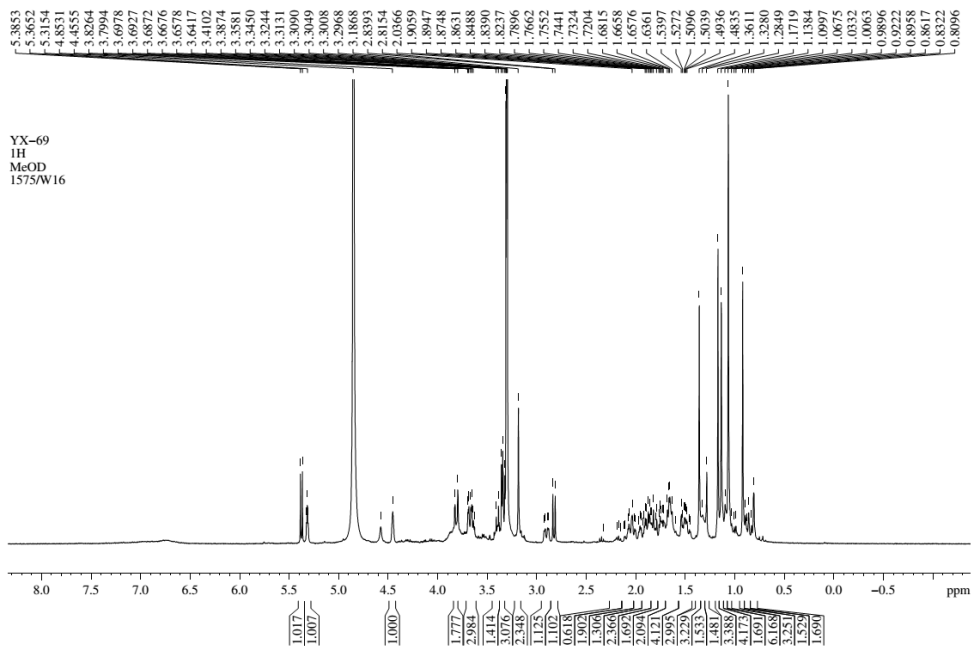

Fig. 3S  $^{13}\text{C}$  NMR spectrum of compound 1

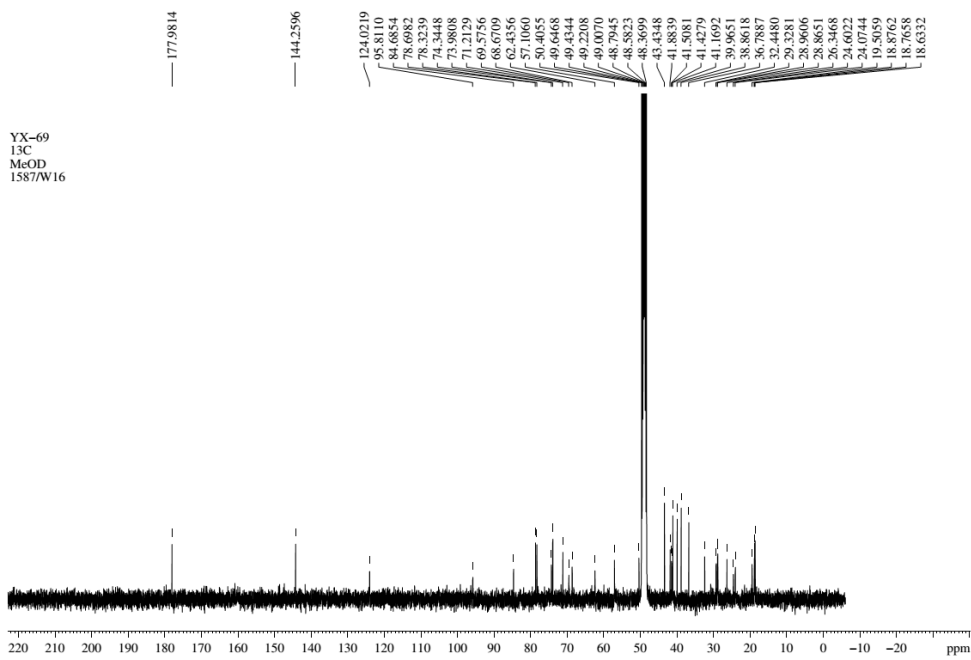

Fig. 4S DEPT-135 spectrum of compound 1

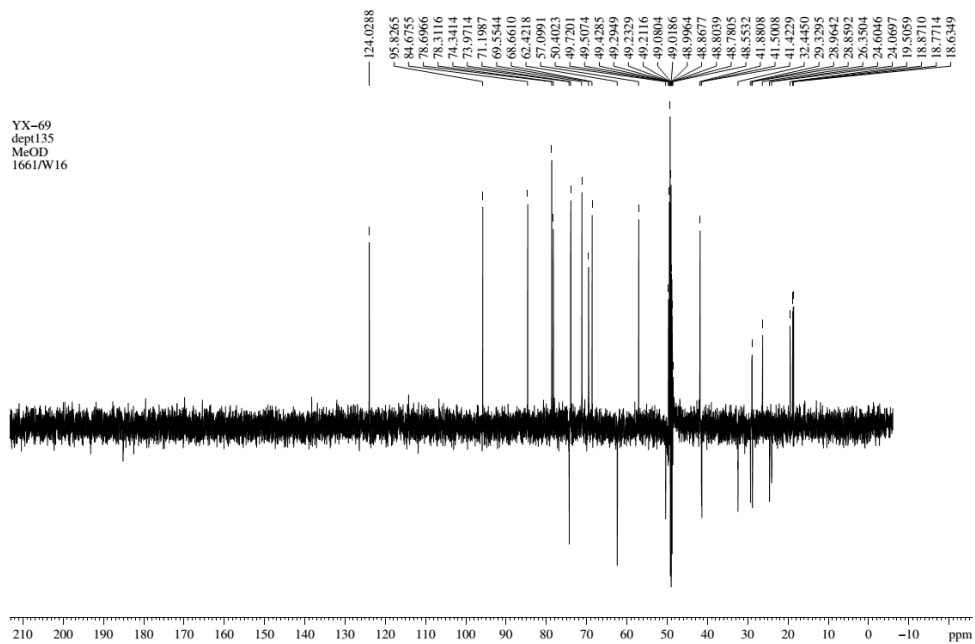

Fig. 5S HSQC spectrum of compound 1

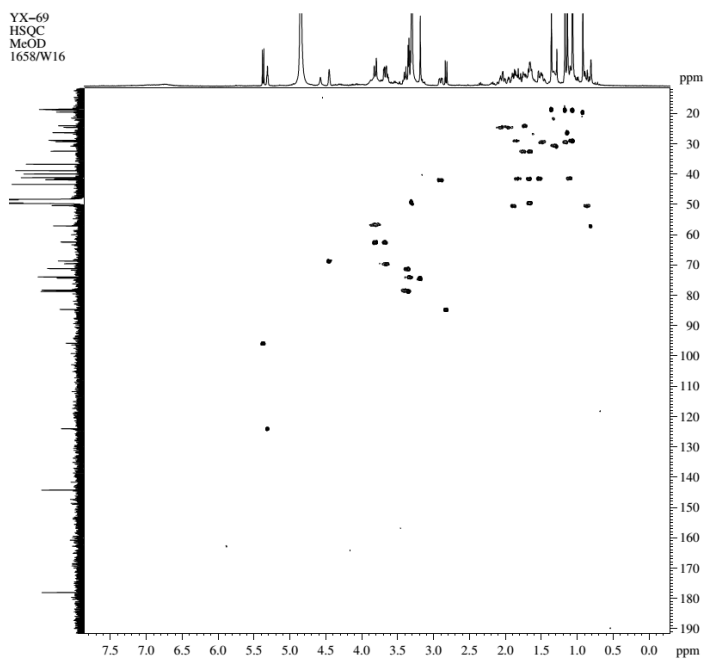

**Fig. 6S**  $^1\text{H}$ - $^1\text{H}$  COSY spectrum of compound **1**

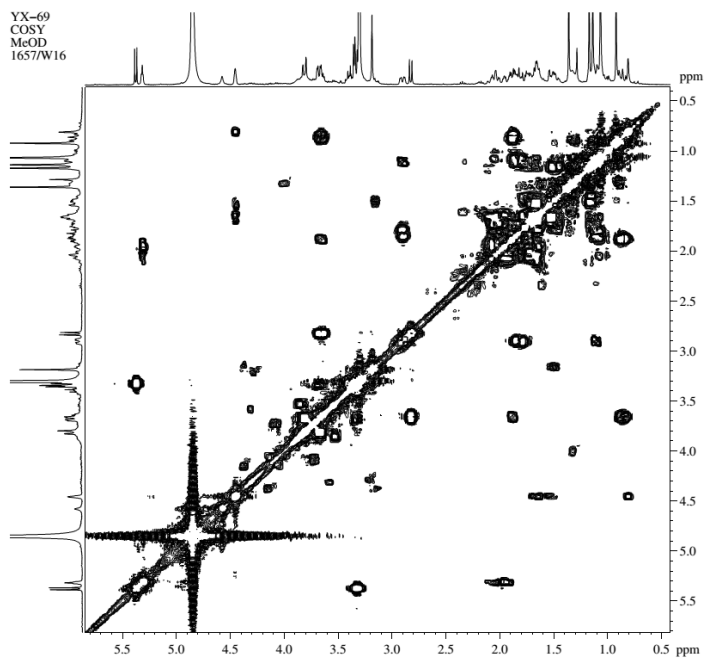

**Fig. 7S** HMBC spectrum of compound **1**

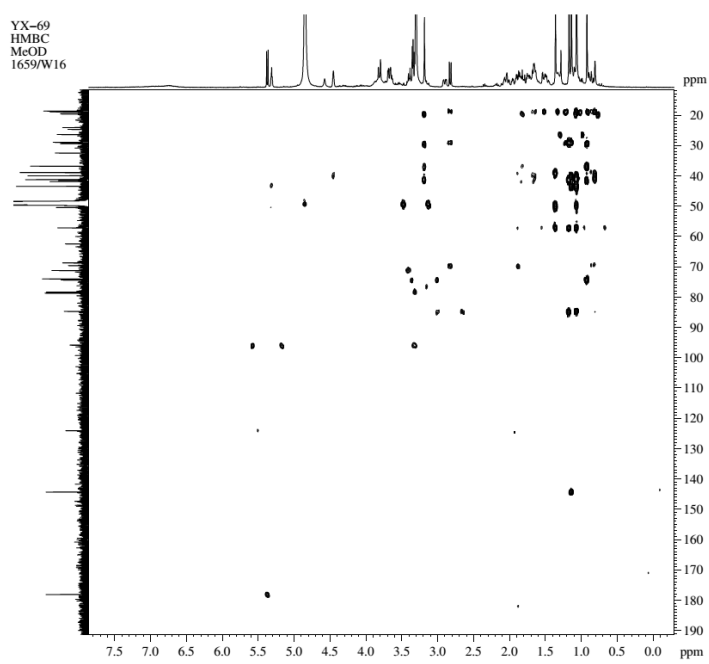



**Fig. 8S** NOESY spectrum of compound **1**

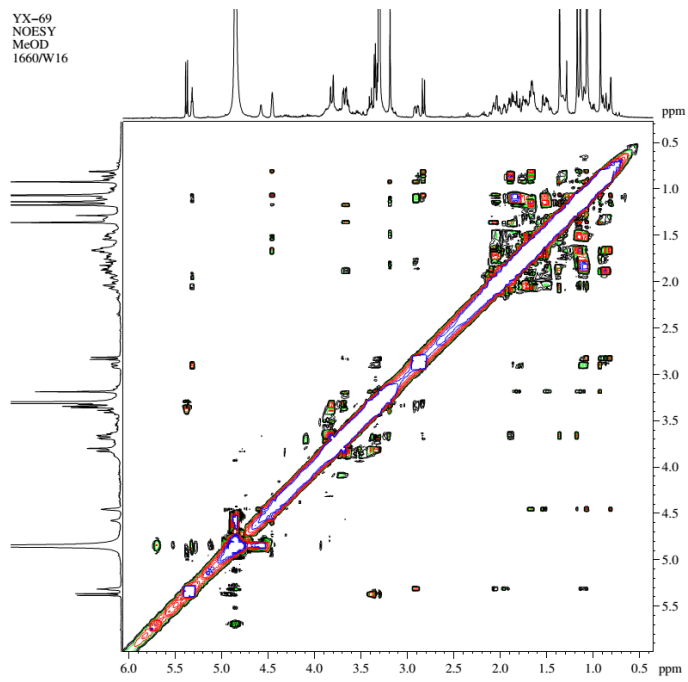

Supplement: Supplementary file 1 [file 14016038]
